# Supplementary material for: Net Reproduction Number as a Real-Time Metric of Population Reproducibility
Source: JMIR Public Health Surveill. 2025 Feb 12;11:e63603. doi: 10.2196/63603 (PMC11837414; doi:10.2196/63603)
Supplement: Multimedia Appendix 2 [file publichealth-v11-e63603-s002.docx]

**Appendix 2.** Description of total fertility rate, reproduction rate, and time-series analysis

|  | Description |
| --- | --- |
| Total fertility rate | We calculated the annual total fatality rate (TFR), defined as the average number of offspring per all females of childbearing age (i.e., 15-49 years), using the number of live births and number of women of childbearing age. |
| Reproduction rate | We estimated the net reproduction rate () to measure the reproductive performance (i.e., reproducibility of the population) in South Korea. represents the mean number of female offspring per woman of childbearing age (i.e., 15-49 years) in the year *t*. An < 1 indicates that the population reproducibility fell below the replacement level.[1-3] We first obtained the annual number of live births and the male-to-female ratio from women of childbearing age between 1970 and 2022 through the Korean national statistics authorities to calculate the mean number of female births.[4] We also collected the population number with the mortality rate of females aged 15-49 to estimate the probability of survival in women of childbearing age. Then, we estimated the annual reproduction rate between 1970-2022 as follows:  ,  where denotes the probability of survival in females aged 15-49 and denotes the mean number of female births from a woman aged 15-49. |
| Time series analysis | We conducted an interrupted time series with segmented regression to assess the time trend and level change in the reproduction rate (log()) of the South Korean population. We used linear regression, including the population control policies of discontinuing family planning and encouraging childbirth, and the regression coefficients to estimate the pre-intervention slope, immediate level change following the policy implementation, and changes in the post-intervention slope of . The model included variables to indicate the pre- or post-intervention period for each policy. We applied backward selection using the Chi-square test to exclude variables that were not significantly related to . Mathematically, the model is as follows:  where estimates the baseline level of ; estimates the baseline trend of ; estimates the level change following the discontinuation of the family planning policy; estimates the trend change after the discontinuation of the family planning policy; estimates the level change following the birth encouragement policy; and estimates the trend change after the birth encouragement policy. |

**References**

1. Alfred J. Lotka. Analytical Theory of Biological Populations. New York, NY: Springer New York, NY; 1998. ISBN: 978-0-306-45927-6.

2. Birley MH. The Estimation of the Net Reproductive Rate (R0) of Multivoltine Pest Populations from Census Data. Journal of Animal Ecology. 1978;47(3):689-96. doi: https://doi.org/10.2307/3664.

3. United Nations Population Fund. World Population Dashboard. New York, United States: UNFPA; 2023 [cited 2 January 2024]; Available from: https://www.unfpa.org/data/world-population-dashboard.

4. Korean Statistical Information Service. Monthly, quarterly, and annual population trends. Daejeon, South Korea: Statistics Korea; 2023 [cited 2 January 2024]; Available from: https://kosis.kr/statHtml/statHtml.do?orgId=101&tblId=DT_1B8000G&conn_path=I2.
